# Supplementary material for: Neuroendocrine Carcinoma of the Larynx and Pharynx: A Clinical and Histopathological Study
Source: MDPI journal article supplement (doi:10.3390/cancers13194813), 2021-09-27
Supplement: s1 [file s1]

# Supplementary Material: Neuroendocrine Carcinoma of the Larynx and Pharynx: A Clinical and Histopathological Study

Primož Strojan, Robert Šifrer, Alfio Ferlito, Cvetka Grašič-Kuhar, Boštjan Lanišnik, Gaber Plavc and Nina Zidar

Table S1. Univariate analysis of survival, all patients (N = 20).

| Parameter               | N  | Local Failure-Free Survival |         | Distant Metastasis-Free Survival |         | NEC Relapse-Free Survival |         | Disease Specific Survival |         | Overall Survival |         |
|-------------------------|----|-----------------------------|---------|----------------------------------|---------|---------------------------|---------|---------------------------|---------|------------------|---------|
|                         |    | At 2/5 Yrs, %               | P-Value | At 2/5 Yrs, %                    | P-Value | At 2/5 Yrs, %             | P-Value | At 2/5 Yrs, %             | P-Value | At 2/5 Yrs, %    | P-Value |
| Age                     |    |                             |         |                                  |         |                           |         |                           |         |                  |         |
| <64 yrs                 | 9  | 89/89                       | 0.48    | 38/38                            | 0.13    | 33/33                     | 0.10    | 56/33                     | 0.11    | 56/33            | 0.77    |
| ≥64 yrs                 | 11 | 91/91                       |         | 88/58                            |         | 80/53                     |         | 100/57                    |         | 72/33            |         |
| Gender                  |    |                             |         |                                  |         |                           |         |                           |         |                  |         |
| Female                  | 5  | 80/80                       | 0.20    | 100/100                          | 0.10    | 80/80                     | 0.52    | 100/100                   | 0.07    | 80/80            | 0.14    |
| Male                    | 15 | 93/93                       |         | 54/36                            |         | 50/34                     |         | 72/30                     |         | 69/21            |         |
| Smoking status          |    |                             |         |                                  |         |                           |         |                           |         |                  |         |
| Nonsmokers <sup>1</sup> | 11 | 100/100                     | 0.29    | 67/50                            | 0.84    | 67/50                     | 0.47    | 100/49                    | 0.33    | 91/44            | 0.09    |
| Smokers                 | 9  | 78/78                       |         | 57/57                            |         | 44/44                     |         | 50/50                     |         | 33/22            |         |
| Pack-years <sup>2</sup> |    |                             |         |                                  |         |                           |         |                           |         |                  |         |
| ≤15                     | 9  | 100/100                     | 0.97    | 57/38                            | 0.80    | 57/38                     | 0.84    | 100/38                    | 0.99    | 89/34            | 0.96    |
| >15                     | 8  | 88/88                       |         | 57/57                            |         | 50/50                     |         | 57/57                     |         | 50/50            |         |
| Primary site            |    |                             |         |                                  |         |                           |         |                           |         |                  |         |
| Larynx                  | 12 | 92/92                       | 0.95    | 67/67                            | 0.33    | 61/61                     | 0.43    | 100/65                    | 0.09    | 83/54            | 0.18    |
| Pharynx                 | 8  | 88/88                       |         | 57/29                            |         | 50/25                     |         | 50/25                     |         | 38/13            |         |
| NEC grade               |    |                             |         |                                  |         |                           |         |                           |         |                  |         |
| WD+MD                   | 6  | 100/100                     | 0.84    | 60/30                            | 0.58    | 60/30                     | 0.57    | 100/30                    | 0.99    | 100/50           | 0.35    |
| PD                      | 14 | 86/86                       |         | 64/64                            |         | 55/55                     |         | 67/58                     |         | 53/31            |         |
| PD NEC <sup>3</sup>     |    |                             |         |                                  |         |                           |         |                           |         |                  |         |
| Small cell              | 6  | 83/83                       | 0.83    | 40/40                            | 0.14    | 33/33                     | 0.18    | 33/33                     | 0.06    | 33/33            | 0.63    |
| Large cell              | 8  | 88/88                       |         | 83/83                            |         | 73/73                     |         | 100/80                    |         | 63/38            |         |
| Ki-67 status            |    |                             |         |                                  |         |                           |         |                           |         |                  |         |
| ≤40                     | 10 | 80/80                       | 0.08    | 71/48                            | 0.78    | 57/38                     | 0.47    | 89/40                     | 0.97    | 69/31            | 0.80    |
| >70                     | 10 | 100/100                     |         | 56/56                            |         | 56/56                     |         | 67/56                     |         | 60/38            |         |
| Stage T                 |    |                             |         |                                  |         |                           |         |                           |         |                  |         |
| 1+2                     | 12 | 92/92                       | 0.72    | 56/56                            | 0.91    | 51/51                     | 0.77    | 89/53                     | 0.63    | 74/37            | 0.94    |
| 3+4                     | 8  | 88/88                       |         | 71/48                            |         | 63/42                     |         | 63/42                     |         | 50/33            |         |
| Stage N                 |    |                             |         |                                  |         |                           |         |                           |         |                  |         |
| N0                      | 10 | 100/100                     | 0.36    | 89/71                            | 0.04    | 89/71                     | 0.02    | 100/69                    | <0.01   | 89/61            | <0.01   |
| N+                      | 10 | 80/80                       |         | 29/29                            |         | 23/23                     |         | 51/25                     |         | 40/10            |         |
| Overall stage           |    |                             |         |                                  |         |                           |         |                           |         |                  |         |
| I-III                   | 11 | 91/91                       | 0.85    | 89/89                            | <0.01   | 81/81                     | 0.03    | 100/83                    | <0.01   | 81/58            | 0.06    |
| IV                      | 9  | 89/89                       |         | 29/14                            |         | 25/13                     |         | 51/13                     |         | 44/11            |         |
| First treatment         |    |                             |         |                                  |         |                           |         |                           |         |                  |         |
| Surgery                 | 10 | 90/90                       | 0.36    | 57/57                            | 0.84    | 51/51                     | 0.75    | 86/57                     | 0.74    | 69/34            | 0.70    |
| No surgery              | 10 | 90/90                       |         | 67/50                            |         | 60/45                     |         | 70/42                     |         | 60/36            |         |

N=Number of patients; yrs=years; WD=Well differentiated; MD=Moderately differentiated; PD=Poorly differentiated; NEC=neuroendocrine carcinoma. 1, Former smokers included; 2, Data not available in 3 patients (N = 17); 3, Patients with poorly differentiated NEC only (N = 14).

**Table S2.** Univariate analysis of survival, moderately and poorly differentiated neuroendocrine carcinoma of the larynx ( $N = 11$ ).

| Parameter               | N | Local failure-free survival |         | Distant metastasis-free survival |         | NEC relapse-free survival |         | Disease specific survival |         | Overall survival |         |
|-------------------------|---|-----------------------------|---------|----------------------------------|---------|---------------------------|---------|---------------------------|---------|------------------|---------|
|                         |   | At 2/5 yrs, %               | P-value | At 2/5 yrs, %                    | P-value | At 2/5 yrs, %             | P-value | At 2/5 yrs, %             | P-value | At 2/5 yrs, %    | P-value |
| Age                     |   |                             |         |                                  |         |                           |         |                           |         |                  |         |
| ≤64 yrs                 | 6 | 83/83                       | 0.25    | 60/60                            | 0.87    | 50/50                     | 0.39    | 100/60                    | 0.86    | 83/50            | 0.86    |
| >64 yrs                 | 5 | 100/100                     |         | 67/67                            |         | 67/67                     |         | 100/67                    |         | 80/53            |         |
| Gender                  |   |                             |         |                                  |         |                           |         |                           |         |                  |         |
| Female                  | 6 | 100/100                     | 0.20    | 40/40                            | 0.13    | 40/40                     | 0.70    | 100/30                    | 0.10    | 83/25            | 0.25    |
| Male                    | 5 | 80/80                       |         | 100/100                          |         | 80/80                     |         | 100/100                   |         | 80/80            |         |
| Pack-years <sup>3</sup> |   |                             |         |                                  |         |                           |         |                           |         |                  |         |
| ≤15                     | 7 | 100/100                     | 0.65    | 40/40                            | 0.13    | 40/40                     | 0.36    | 100/40                    | 0.16    | 86/34            | 0.42    |
| >15                     | 4 | 75/75                       |         | 100/100                          |         | 75/75                     |         | 100/100                   |         | 75/75            |         |
| NEC grade               |   |                             |         |                                  |         |                           |         |                           |         |                  |         |
| MD                      | 4 | 100/100                     | 0.65    | 33/33                            | 0.22    | 33/33                     | 0.22    | 100/33                    | 0.35    | 100/33           | 0.98    |
| PD                      | 7 | 86/86                       |         | 80/80                            |         | 68/68                     |         | 100/80                    |         | 57/57            |         |
| Ki-67 status            |   |                             |         |                                  |         |                           |         |                           |         |                  |         |
| ≤40%                    | 6 | 83/83                       | 0.25    | 50/50                            | 0.51    | 42/42                     | 0.22    | 100/50                    | 0.70    | 83/42            | 0.80    |
| >70%                    | 5 | 100/100                     |         | 75/75                            |         | 75/75                     |         | 100/75                    |         | 60/60            |         |
| Stage N                 |   |                             |         |                                  |         |                           |         |                           |         |                  |         |
| N0                      | 7 | 100/100                     | 0.19    | 83/83                            | 0.07    | 83/83                     | 0.03    | 100/80                    | <0.01   | 100/80           | <0.01   |
| N+                      | 4 | 75/75                       |         | 0/0                              |         | 0/0                       |         | 100/0                     |         | 50/0             |         |
| Overall stage           |   |                             |         |                                  |         |                           |         |                           |         |                  |         |
| I+II                    | 5 | 100/100                     | 0.86    | 75/75                            | 0.62    | 75/75                     | 0.62    | 100/75                    | 0.28    | 100/75           | 0.09    |
| III+IV                  | 6 | 83/83                       |         | 50/50                            |         | 42/42                     |         | 100/50                    |         | 67/33            |         |
| First treatment         |   |                             |         |                                  |         |                           |         |                           |         |                  |         |
| Surgery                 | 7 | 86/86                       | 0.13    | 50/50                            | 0.62    | 43/43                     | 0.18    | 100/50                    | 0.43    | 71/36            | 0.19    |
| No surgery              | 4 | 100/100                     |         | 75/75                            |         | 75/75                     |         | 100/67                    |         | 100/67           |         |

N–Number of patients; yrs–years; NEC–neuroendocrine carcinoma; MD–Moderately differentiated; PD–Poorly differentiated.

**Publisher's Note:** MDPI stays neutral with regard to jurisdictional claims in published maps and institutional affiliations.

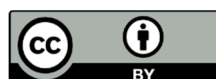

© 2021 by the authors. Licensee MDPI, Basel, Switzerland. This article is an open access article distributed under the terms and conditions of the Creative Commons Attribution (CC BY) license (<http://creativecommons.org/licenses/by/4.0/>).
